# Supplementary material for: The antihelminthic drug niclosamide effectively inhibits the malignant phenotypes of uveal melanoma in vitro and in vivo
Source: PubMed Central journal article supplement — Theranostics. 2017 Apr 3;7(6):1447–62. doi: 10.7150/thno.17451 (PMC5436505; doi:10.7150/thno.17451), 2017-04-03
Supplement: thnov07p1447s1.pdf [file thnov07p1447s1.pdf]

## Supplementary Figure S1

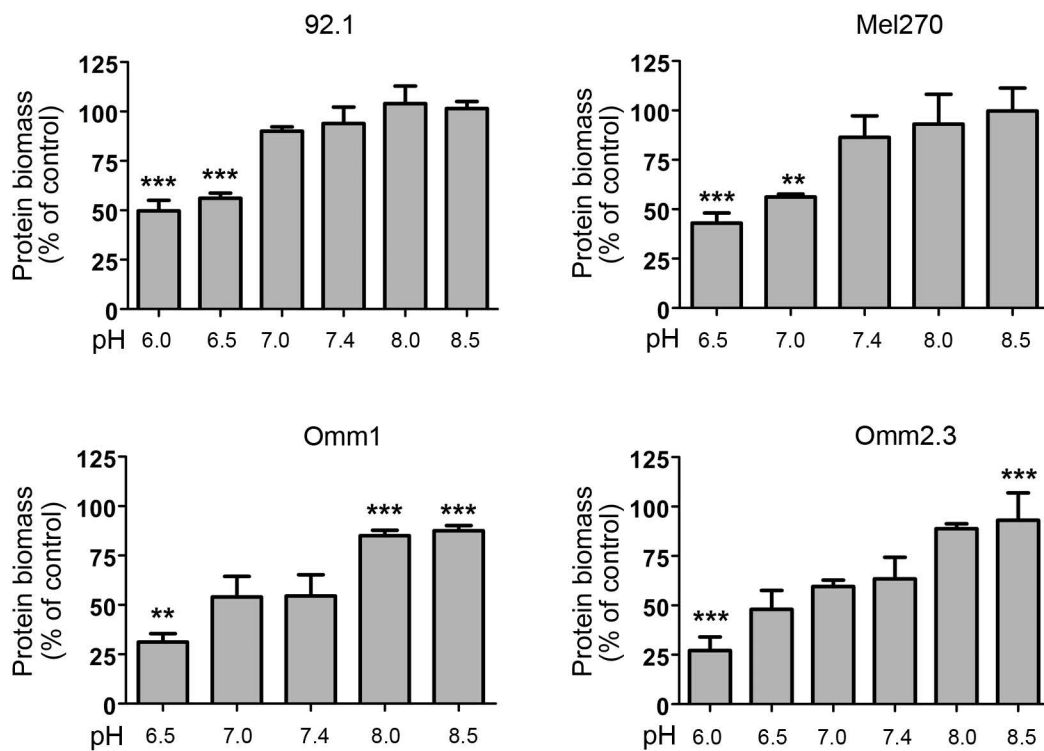

**Supplementary Figure S1. Niclosamide inhibits the growth of uveal melanoma cells in pH-dependent manner.** UM cells (92.1, Mel270, Omm1 and Omm2.3) were exposed to niclosamide dissolved in escalating pH levels of culture medium from 6.0 to 8.5 for 72 h. The cell growth was determined by sulforhodamine B assay. The drug-free of Mel270 and Omm1 cells had no viability in pH=6.0 (data not shown). Each group was compared to pH=7.4. Bar graphs: mean  $\pm$  SD (n=4), \*,  $p < 0.05$ ; \*\*,  $p < 0.01$ ; \*\*\*,  $p < 0.001$ , one-way ANOVA, *post hoc* comparisons, Tukey's test.

# Supplementary Figure S2

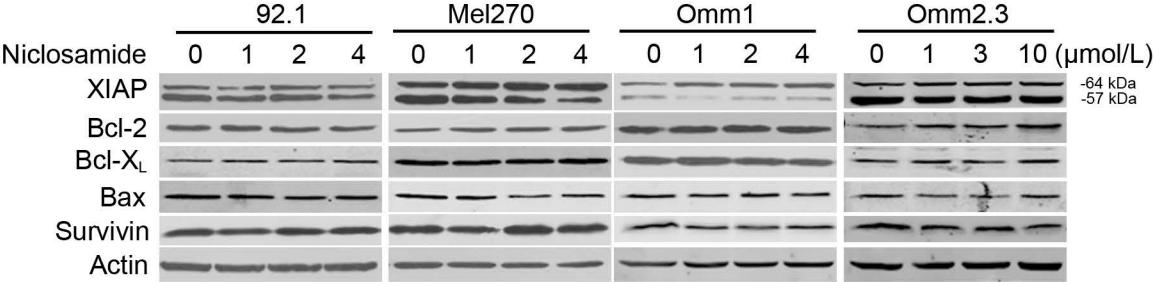

**Supplementary Figure S2. The effects of niclosamide on apoptosis-related proteins.** Uveal melanoma cells were incubated with niclosamide for 48 h and cell lysates were analyzed by Western blot using indicated antibodies.

## Supplementary Figure S3

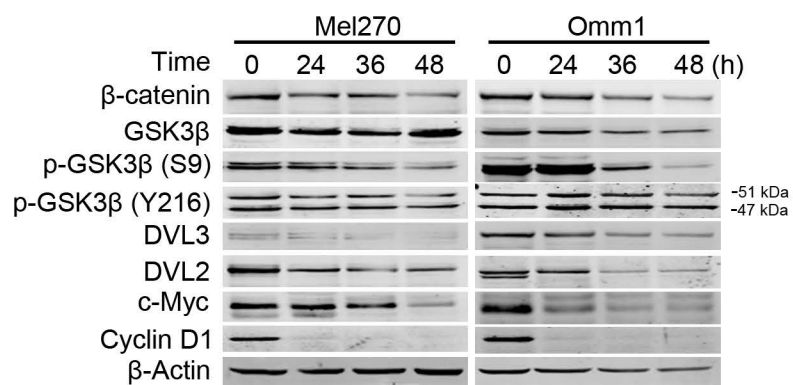

**Supplementary Figure S3. Niclosamide time-dependently blocks the Wnt/β-catenin signaling pathway in uveal melanoma cells.** Uveal melanoma cells were incubated with niclosamide at indicated times and cell lysates were analyzed by Western blot using indicated antibodies.

## Supplementary Figure S4

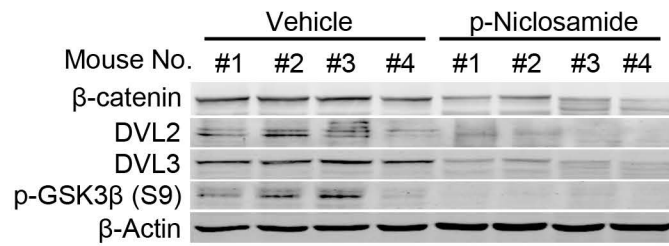

**Supplementary Figure S4. Niclosamide blocks the Wnt/ $\beta$ -catenin pathway in the tumor xenografted mice.** Key molecules of Wnt/ $\beta$ -catenin pathway were analyzed in whole cell lysates prepared from xenografted tumor tissues of vehicle- or p-niclosamide-treated mice.

## Supplementary Table S1

**Table S1. The sequence of scramble (PLKO.1-Non-target-shRNA) and human MMP-9 specific target shRNA**

| Name                    | Sequence                                                   |
|-------------------------|------------------------------------------------------------|
| PLKO.1-Non-target shRNA | CCGGGCGCGATAGCGCTAATAATTTCTCGAGAAATTATTAGCGCTATCGCGCTTTTT  |
| shMMP-9 #1              | CCGGCCACAACATCACCTATTGGATCTCGAGATCCAATAGGTGATGTTGTGGTTTTTG |
| shMMP-9 #2              | CCGGCAGTTTCCATTCATCTTCCAACCTCGAGTTGGAAGATGAATGGAACTGTTTTTG |
